# Supplementary material
Source: PubMed Central journal article supplement (PMC8149373)
Supplement: mmc1.pdf [file mmc1.pdf]

**Cell Reports Medicine, Volume 2**

**Supplemental information**

**Asymptomatic and symptomatic SARS-CoV-2  
infections elicit polyfunctional antibodies**

**Jérémy Dufloo, Ludivine Grzelak, Isabelle Staropoli, Yoann Madec, Laura Tondeur, François Anna, Stéphane Pelleau, Aurélie Wiedemann, Cyril Planchais, Julian Buchrieser, Rémy Robinot, Marie-Noelle Ungeheuer, Hugo Mouquet, Pierre Charneau, Michael White, Yves Lévy, Bruno Hoen, Arnaud Fontanet, Olivier Schwartz, and Timothée Bruel**

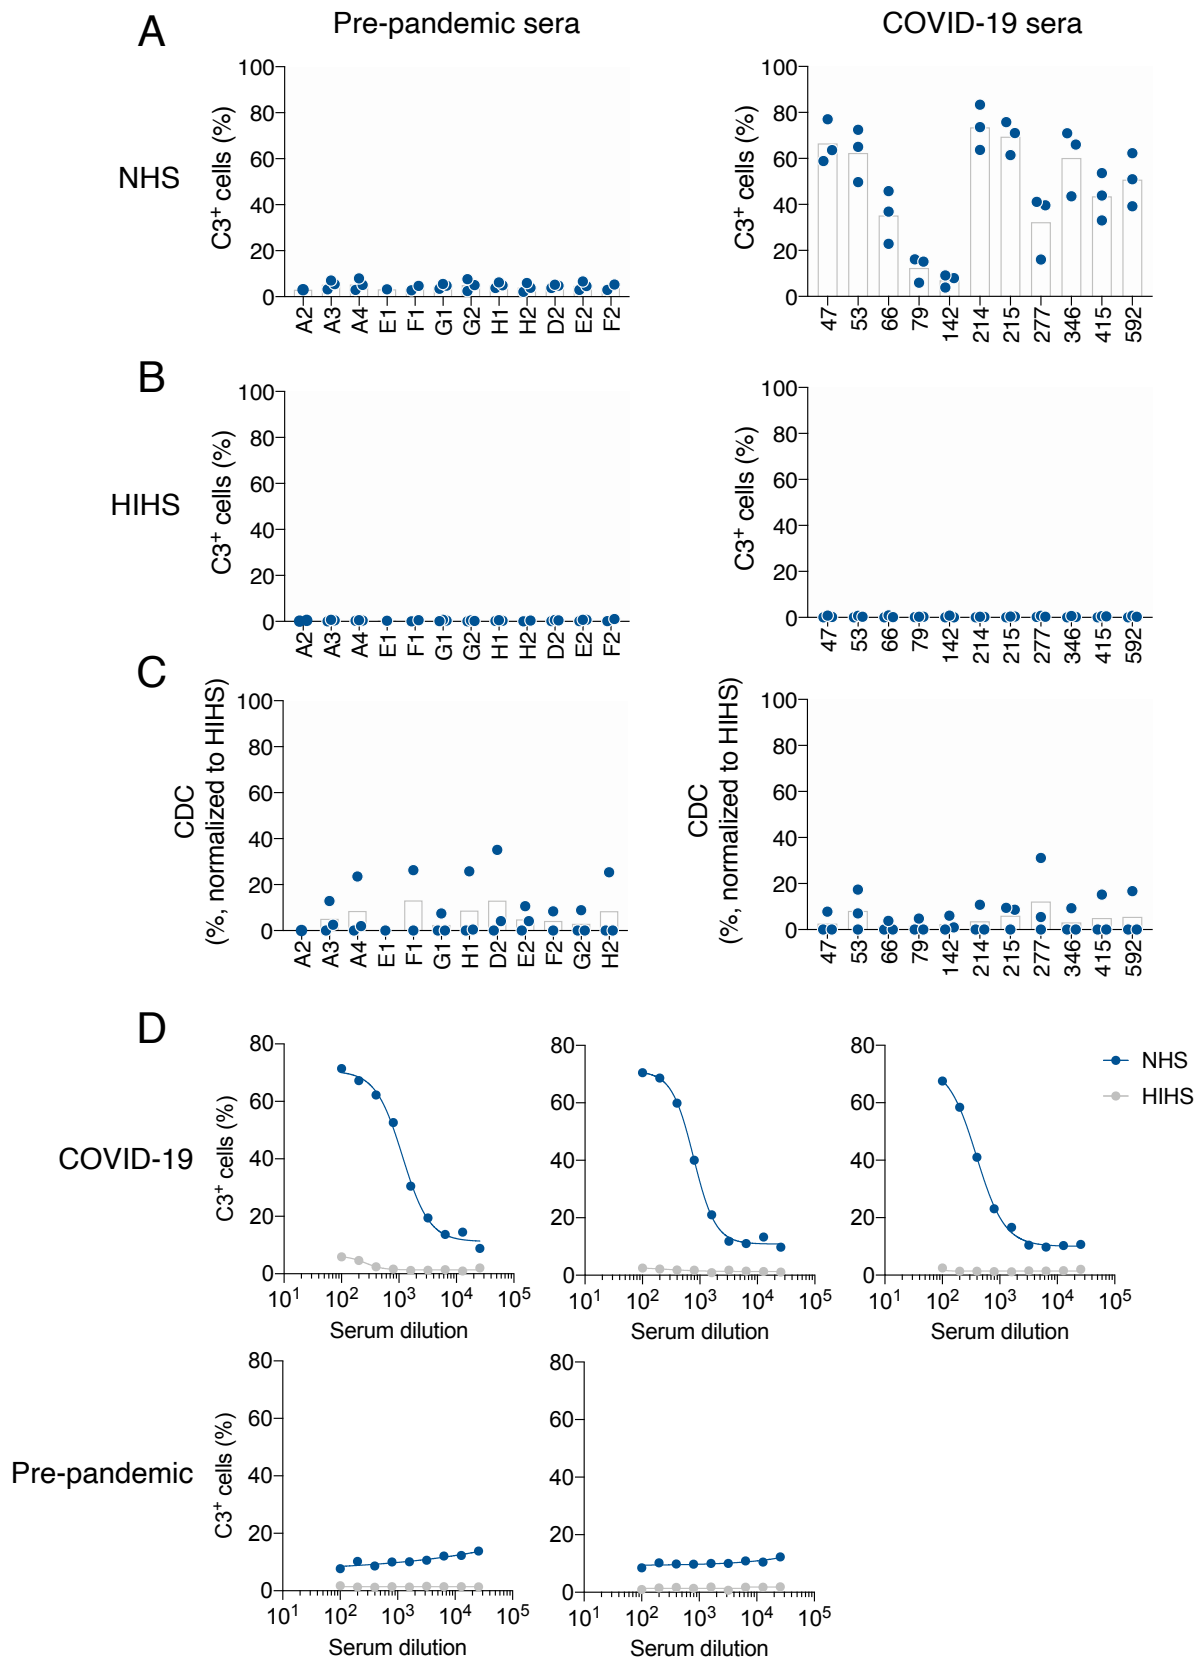

**Figure S1. COVID-19 sera induce complement activation on SARS-CoV-2-infected cells. Related to Figure 1.**

**A.** Percentage of C3<sup>+</sup> cells among infected cells (Spike<sup>+</sup>) for each pre-pandemic (left) and COVID-19 (right) serum in presence of normal human serum (NHS) as a source of complement. Each dot represents an independent experiment (n=3).

**B.** Percentage of C3<sup>+</sup> cells among infected cells (Spike<sup>+</sup>) for each pre-pandemic (left) and COVID-19 (right) serum in presence of heat-inactivated human serum (HIHS) as a control. Each dot represents an independent experiment (n=3).

**C.** Complement-dependent cytotoxicity (CDC) of infected A549-ACE2 cells was measured for each pre-pandemic (left) and COVID-19 (right) serum as the relative disappearance of Spike<sup>+</sup> cells in the NHS condition compared to the HIHS condition. Each dot represents an independent experiment (n=3).

**D.** Percentage of C3<sup>+</sup> cells among infected cells (Spike<sup>+</sup>) after incubation with increasing dilutions of 3 COVID-19 sera (top) and 2 pre-pandemic sera (bottom), and normal (NHS; blue) or heat-inactivated human serum (HIHS; grey). One representative experiment is shown.

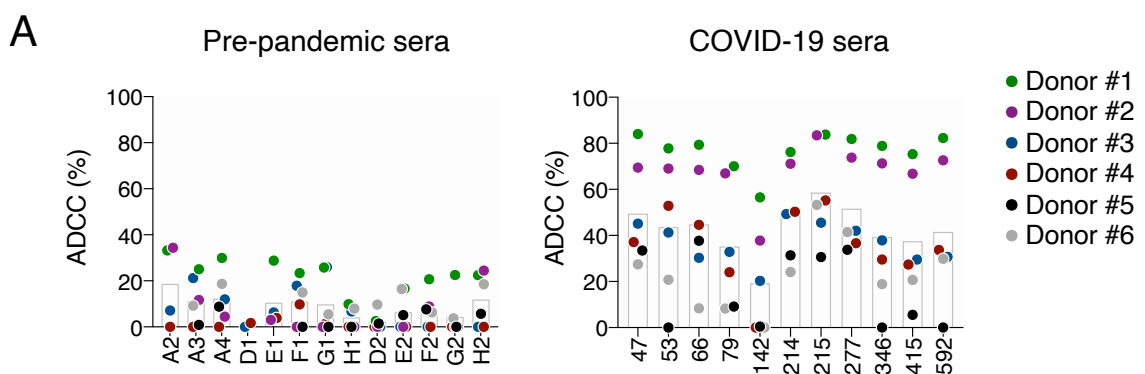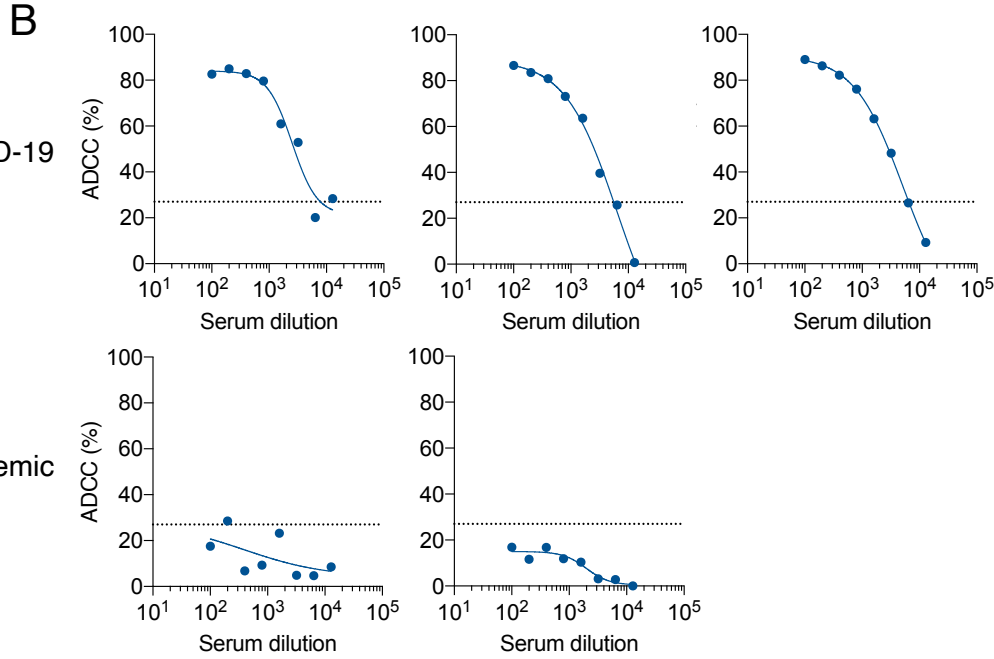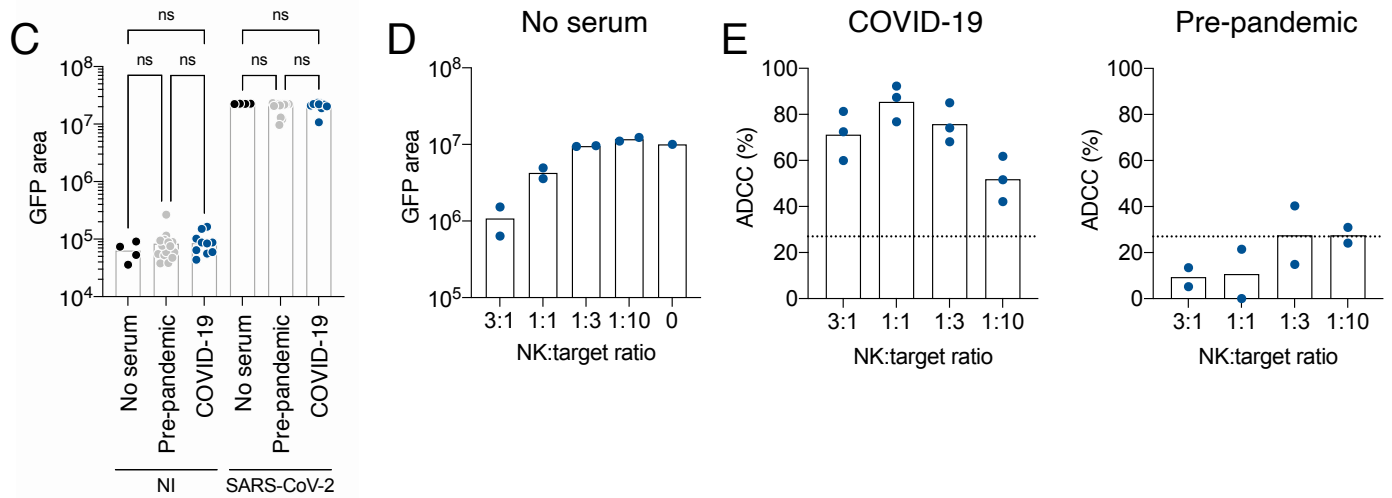

**Figure S2. COVID-19 sera trigger antibody-dependent cellular cytotoxicity by NK cells. Related to Figure 2.**

**A.** The percentage of ADCC of infected cells was measured for each pre-pandemic (left) and COVID-19 serum (right). Each dot represents a different donor of NK cells (n=2-6).

**B.** The percentage of ADCC of infected cells was measured with increasing dilutions of 3 COVID-19 sera (top) and 2 pre-pandemic sera (bottom). The mean of two donors of NK cells is shown.

**C.** U2OS-ACE2 cells infected or not with SARS-CoV-2 were incubated for 6h with pre-pandemic sera (n=15) or COVID-19 sera (n=10) (dilution 1:100). Cells incubated without serum were included as a control. The area of GFP is plotted. Each dot represents a different donor of serum. ns: not significant (Kruskal-Wallis test).

**D.** U2OS-ACE2 cells were infected with SARS-CoV-2 and co-cultured for 6h with NK cells at different NK cells:U2OS-ACE2 cells ratios. A control without NK cells (0) was included. The GFP area was then measured to detect any spontaneous killing of infected cells (GFP+) by NK cells. Each dot represents a different donor of NK cells (n=2).

**E.** U2OS-ACE2 cells were infected with SARS-CoV-2 and co-cultured for 6h with NK cells at different NK cells:U2OS-ACE2 cells ratios and COVID-19 sera (n=3; left) or pre-pandemic sera (n=2; right). Each dot represents the mean ADCC for a donor of serum measured with NK cells from two different donors.

In B and E, the dashed line represents the threshold of positivity calculated with pre-pandemic sera.

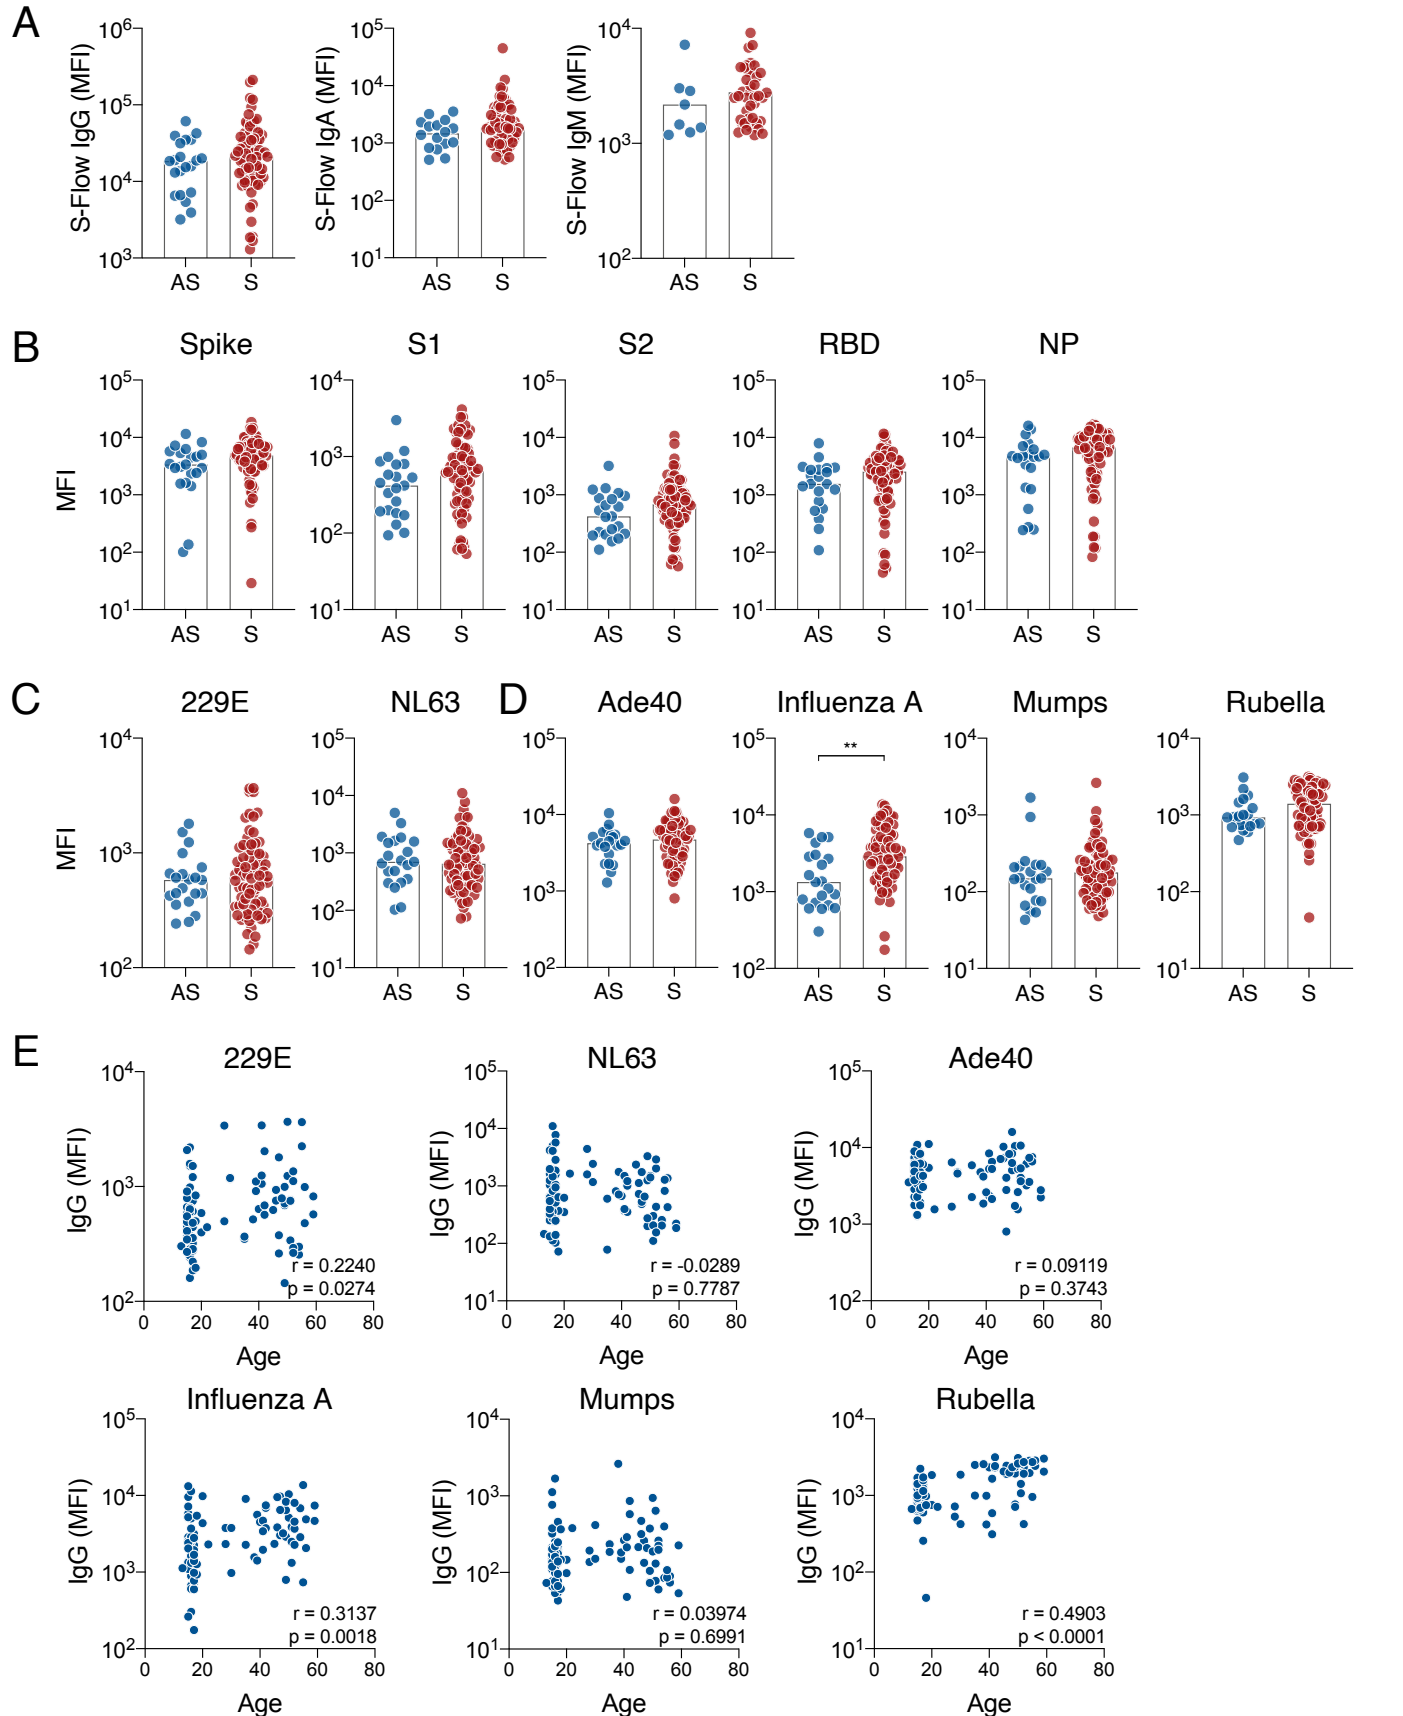

**Figure S3. Antibody response against SARS-CoV-2, 229E and NL63 seasonal coronaviruses and control antigens. Related to Figure 3.**

**A.** IgG (left), IgA (middle) and IgM (right) levels were quantified in asymptomatic (AS; blue; n=21) and mildly symptomatic (S; red; n=76) individuals using the flow-cytometry-based S-Flow assay. The median fluorescence intensity (MFI) of staining in S-Flow+ individuals is represented.

**B-D.** Asymptomatic (n=21; AS) and symptomatic (n=76; S) sera were analyzed by Luminex to measure the antibody response against SARS-CoV-2 viral antigens (**B**), seasonal coronaviruses 229E and NL63 (**C**) and control antigens (**D**). The median fluorescence intensities (MFI) are represented. The bar represents the median. \*\*p<0.01 (Mann-Whitney test).

**E.** Correlation between the age and the antibody levels against the indicated antigens (n=97 individuals). A Spearman correlation test was performed and the correlation r and p-value are indicated.

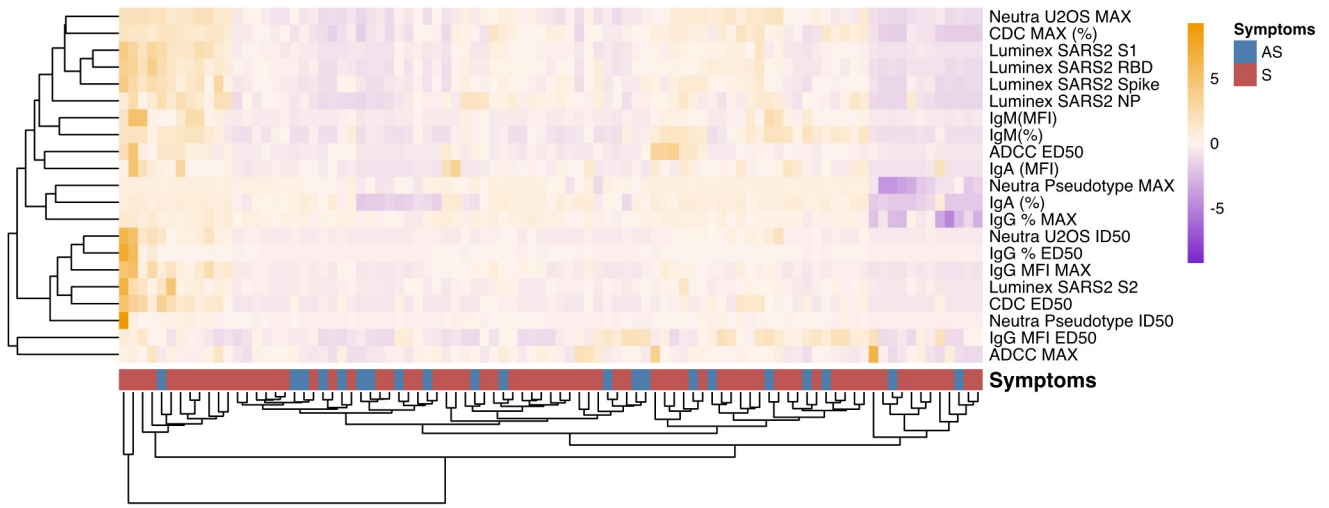

**Figure S4. Hierarchical clustering of antibody features in asymptomatic and symptomatic individuals. Related to Figure 5.**

Hierarchical clustering of asymptomatic and symptomatic patients based on serological features. Patients and antibody features were clustered using k-means clustering. Each column represents an individual patient. Each feature (line) was normalized with minimum value in purple and maximum value in orange. Patients were tagged as asymptomatic (blue, n=21) or symptomatic (red, n=70).

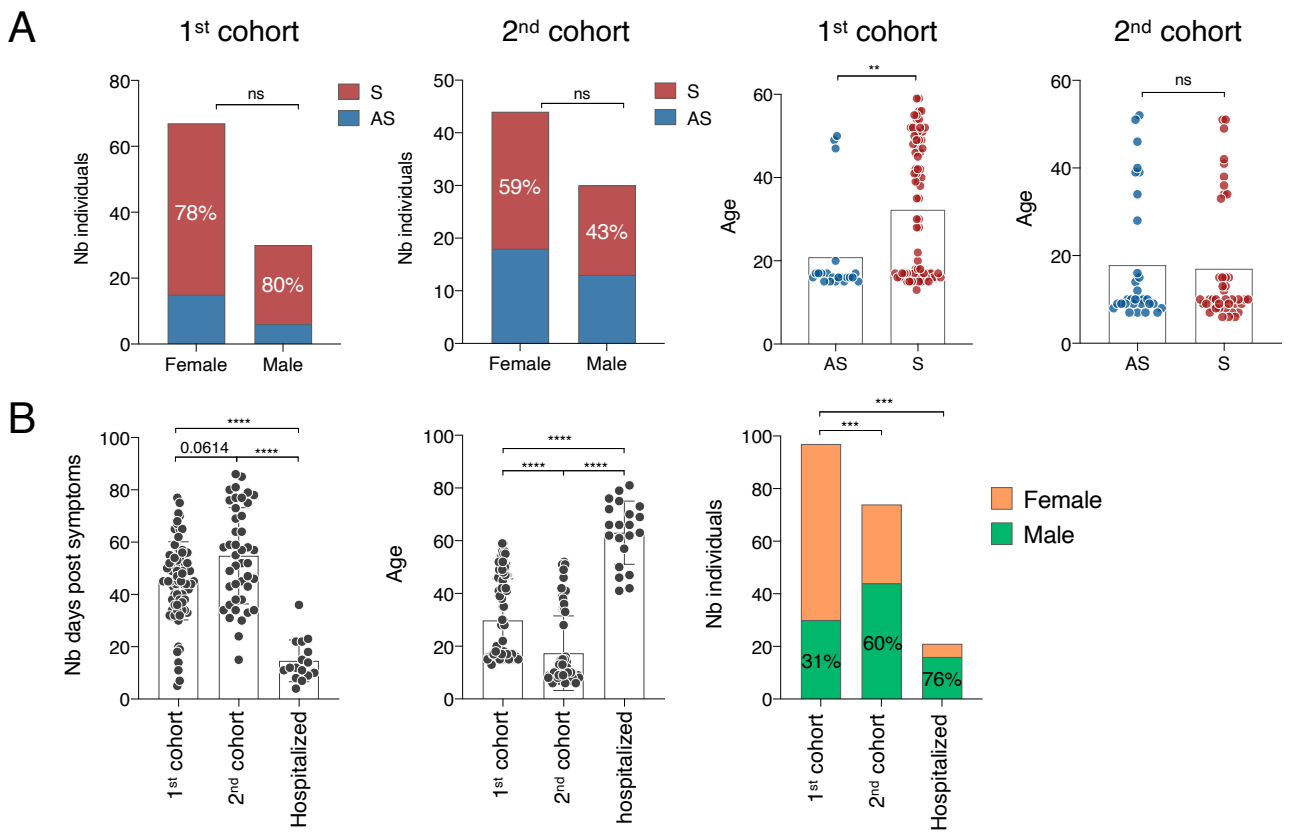

**Figure S5. Age and gender composition of the different cohorts. Related to Figure 6.**

**A.** The gender ratio and the age was compared between asymptomatic and symptomatic patients from the first and second cohorts. A Mann-Whitney test was performed. ns. not significant, \*\* $p < 0.01$ .

**B.** The duration post-symptom onset, the age and the gender ratio were compared between the first cohort (AS and S), the second cohort (AS and S) and the hospitalized patients (H). A Kruskal-Wallis test was performed. \*\*\* $p < 0.001$ , \*\*\*\* $p < 0.0001$ .

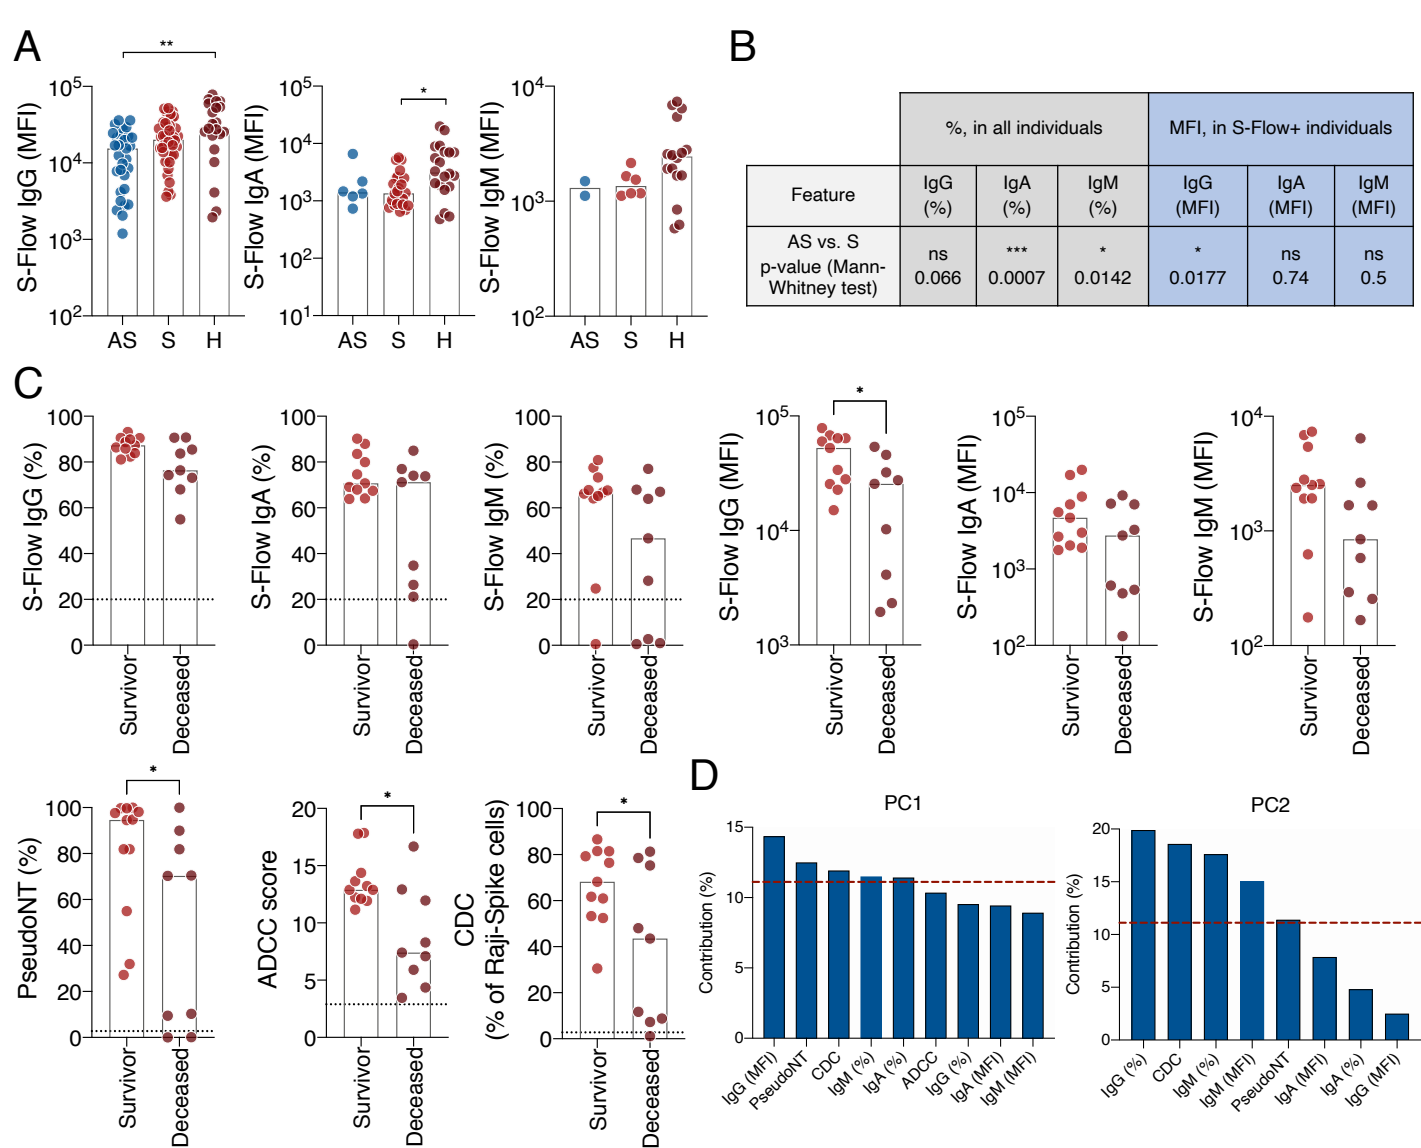

**Figure S6. Antibody response in other cohorts of asymptomatic, symptomatic and hospitalized individuals. Related to Figure 6.**

**A.** IgG (left), IgA (middle) and IgM (right) levels were quantified in asymptomatic (AS; blue; n=31), mildly symptomatic (S; red; n=43) and hospitalized (H; brown; n=21) individuals using the flow-cytometry-based S-Flow assay. The median fluorescence intensity (MFI) of staining in S-Flow+ individuals is represented. The bar represents the median \*p<0.05, \*\*p<0.01 (Kruskal-Wallis test).

**B.** IgG, IgA and IgM levels in asymptomatic and symptomatic patients were compared using a Mann-Whitney test. Comparisons include the percentages of positive cells in all individuals (grey) and the MFI of staining in S-Flow+ individuals only (blue).

**C.** Antibody features were compared between hospitalized patients who survived (n=11) or died (n=9) from the infection. \*p<0.05 (Mann-Whitney test).

**D.** Contribution percentages to first (left) and second (right) dimensions of the 9 antibody features included in the principal component analysis performed on asymptomatic (n=31), symptomatic (n=43), and hospitalized patients (n=21).

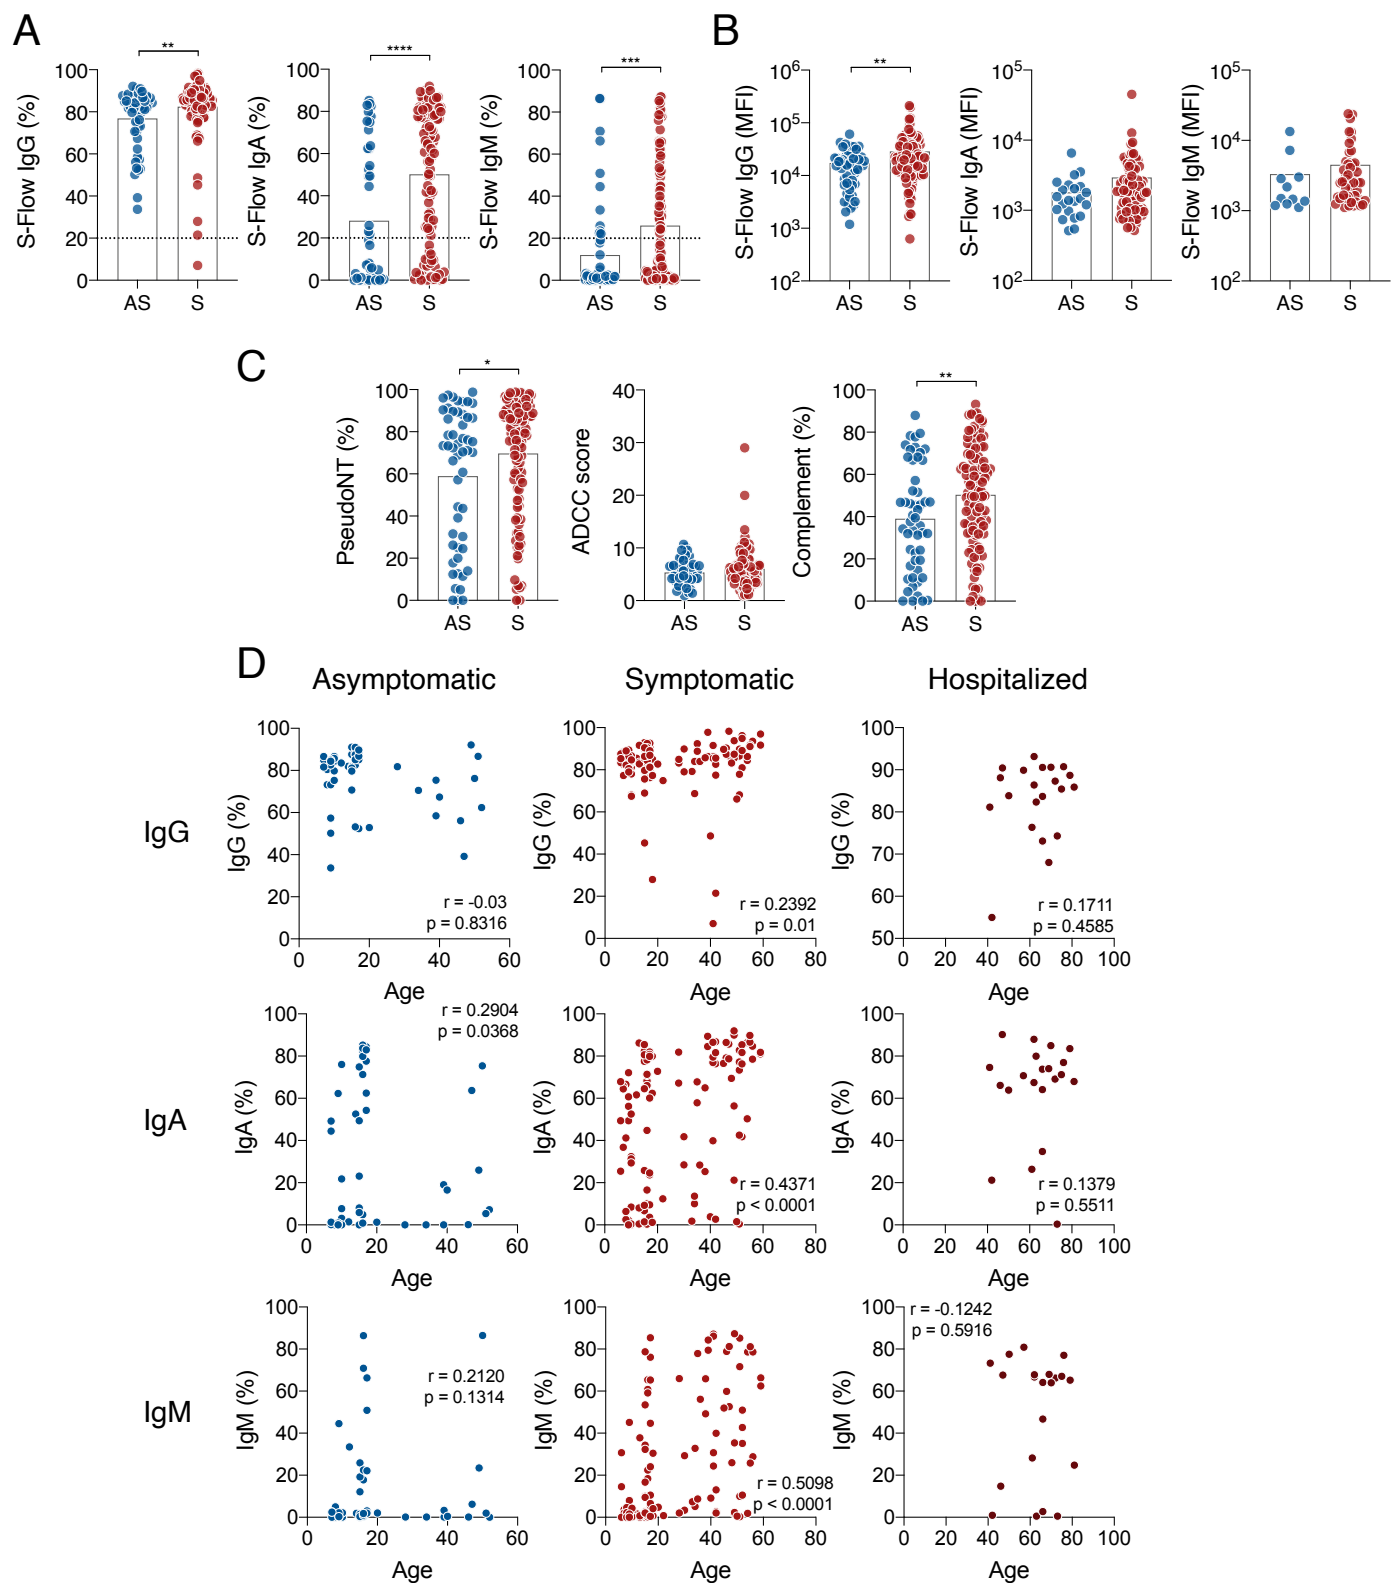

**Figure S7. Pooled analysis of antibody responses in asymptomatic symptomatic individuals from the two cohorts. Related to Figure 6.**

**A.** IgG (left), IgA (middle) and IgM (right) levels were quantified in asymptomatic (AS; blue; n=52) and mildly symptomatic (S; red; n=119) individuals from the two cohorts using the flow-cytometry-based S-Flow assay. The percentage of positive cells is represented. The dotted line represents the threshold of positivity measured with pre-pandemic sera.

**B.** IgG (left), IgA (middle) and IgM (right) levels were quantified in asymptomatic (AS; blue; n=52) and mildly symptomatic (S; red; n=119) individuals from the two cohorts using the flow-cytometry-based S-Flow assay. The median fluorescence intensity (MFI) of staining in S-Flow+ individuals is represented.

**C.** AS (n=52) and S (n=119) sera from the two cohorts were tested for their ability to neutralize Spike pseudoparticles (left), trigger ADCC in the Jurkat-CD16-NFAT-rLuc/Raji-Spike system (middle) or trigger CDC of Raji-Spike cells (right).

**D.** Correlation between the age of donors and IgG (top), IgA (middle) or IgM (bottom) levels in asymptomatic (left; n=52), symptomatic (center; n=119) or hospitalized (right; n=21) patients. A Spearman correlation test was performed and the correlation  $r$  and  $p$ -value are indicated.

In A-C, the bar indicates the median. Mann-Whitney tests were performed (\* $p < 0.05$ ; \*\* $p < 0.01$ ; \*\*\* $p < 0.001$ ; \*\*\*\* $p < 0.0001$ ).



**Table S1. Characteristics of the pre-pandemic individuals and donors of NK cells. Related to Figures 1-2.**

|                                 | <b>Pre-pandemic<br/>N=28</b>   | <b>NK cells donors<br/>N=6</b> |
|---------------------------------|--------------------------------|--------------------------------|
| Gender ( N (%) )<br><i>male</i> | 10 (35.7)                      | 4 (66.6)                       |
| Age ( <i>median (IQR)</i> )     | 46 (35-52)                     | >18; <70                       |
| Sampling date (interval)        | September 2014 -<br>April 2019 | July 2019 -<br>September 2019  |

**Table S2. Characteristics of patients enrolled in Crépy-en-Valois high school. Related to Figures 1-5.**

|                                   | <b>Asymptomatic<br/>N=21</b> | <b>Symptomatic<br/>N=76</b> | <b>total<br/>N=97</b> |
|-----------------------------------|------------------------------|-----------------------------|-----------------------|
|                                   | <i>N (%)</i>                 | <i>N (%)</i>                | <i>N (%)</i>          |
| Gender                            |                              |                             |                       |
| <i>male</i>                       | 6 (28.6)                     | 24 (31.6)                   | 30 (30.9)             |
| Age ( <i>median (IQR)</i> )       | 16 (16-17)                   | 30 (16.5-48.5)              | 18 (16-47)            |
| Status                            |                              |                             |                       |
| <i>teacher</i>                    | 0                            | 17 (22.4)                   | 17 (17.5)             |
| <i>staff (other than teacher)</i> | 0                            | 8 (10.5)                    | 8 (8.2)               |
| <i>parents</i>                    | 2 (9.5)                      | 12 (15.8)                   | 14 (14.4)             |
| <i>relatives</i>                  | 1 (4.8)                      | 5 (6.6)                     | 6 (6.2)               |
| <i>students</i>                   | 18 (85.7)                    | 33 (43.4)                   | 51 (52.6)             |
| <i>other</i>                      | 0                            | 1 (1.3)                     | 1 (1.0)               |
| Hospitalization (outpatients)     | 0                            | 8 (10.5)                    | 8 (8.2)               |
| Symptomes                         |                              |                             |                       |
| <i>fever</i>                      | 0                            | 40 (52.6)                   | 40 (41.2)             |
| <i>cough</i>                      | 0                            | 35 (46.0)                   | 35 (36.1)             |
| <i>shortness of breath</i>        | 0                            | 21 (27.6)                   | 21 (21.6)             |
| <i>loss of taste</i>              | 0                            | 28 (36.8)                   | 28 (28.9)             |
| <i>loss of smell</i>              | 0                            | 30 (39.5)                   | 30 (30.9)             |
| <i>muscle pain</i>                | 0                            | 37 (48.7)                   | 37 (38.1)             |
| <i>sore throat</i>                | 0                            | 29 (38.2)                   | 29 (29.9)             |
| <i>rhinorrhea</i>                 | 0                            | 37 (48.7)                   | 37 (38.1)             |
| <i>diarrhea</i>                   | 0                            | 26 (34.2)                   | 26 (26.8)             |
| <i>cephalgia</i>                  | 0                            | 41 (53.9)                   | 41 (42.3)             |
| <i>asthenia</i>                   | 0                            | 41 (53.9)                   | 41 (42.3)             |

**Table S3. Characteristics of patients enrolled in Crépy-en-Valois primary schools. Related to Figure 6.**

|                                   | <b>Asymptomatic<br/>N=31</b> | <b>Symptomatic<br/>N=43</b> | <b>total<br/>N=74</b> |
|-----------------------------------|------------------------------|-----------------------------|-----------------------|
|                                   | <i>N (%)</i>                 | <i>N (%)</i>                | <i>N (%)</i>          |
| Gender                            |                              |                             |                       |
| <i>male</i>                       | 13 (41.9)                    | 17 (39.5)                   | 30 (40.5)             |
| Age ( <i>median (IQR)</i> )       | 10 (9-28)                    | 10 (9-15)                   | 10 (9-16)             |
| Status                            |                              |                             |                       |
| <i>teacher</i>                    | 0                            | 1 (2.3)                     | 1 (1.3)               |
| <i>staff (other than teacher)</i> | 0                            | 0                           | 0                     |
| <i>parents</i>                    | 8 (25.8)                     | 9 (20.9)                    | 17 (23.0)             |
| <i>relatives</i>                  | 4 (12.9)                     | 7 (16.3)                    | 11 (14.9)             |
| <i>students</i>                   | 19 (61.3)                    | 26 (60.5)                   | 45 (60.8)             |
| <i>other</i>                      | 0                            | 0                           | 0                     |
| Hospitalization                   | 0                            | 0                           | 0                     |
| Symptomes                         |                              |                             |                       |
| <i>fever</i>                      | 0                            | 21 (48.8)                   | 21 (28.4)             |
| <i>cough</i>                      | 0                            | 16 (37.2)                   | 16 (21.6)             |
| <i>shortness of breath</i>        | 0                            | 7 (16.3)                    | 7 (9.5)               |
| <i>loss of taste</i>              | 0                            | 6 (13.9)                    | 6 (8.1)               |
| <i>loss of smell</i>              | 0                            | 5(11.6)                     | 5 (6.8)               |
| <i>muscle pain</i>                | 0                            | 10 (23.3)                   | 10 (13.5)             |
| <i>sore throat</i>                | 0                            | 12 (27.9)                   | 12 (16.2)             |
| <i>rhinorrhea</i>                 | 0                            | 15 (34.9)                   | 15 (20.3)             |
| <i>diarrhea</i>                   | 0                            | 12 (27.9)                   | 12 (16.3)             |
| <i>cephalgia</i>                  | 0                            | 17 (39.5)                   | 17 (23.0)             |
| <i>asthenia</i>                   | 0                            | 22 (51.2)                   | 22 (29.7)             |

**Table S4. Characteristics of hospitalized patients. Related to Figures 6-7.**

|                                                       | <b>Total N=21</b> |
|-------------------------------------------------------|-------------------|
|                                                       | <i>N (%)</i>      |
| Gender                                                |                   |
| <i>male</i>                                           | 16 (76.2)         |
| Age ( <i>median (IQR)</i> )                           | 63 (55-72)        |
| ICU admission                                         |                   |
| <i>yes</i>                                            | 19 (90.5)         |
| <i>no</i>                                             | 1 (4.8)           |
| <i>missing information</i>                            | 1 (4.8)           |
| Treatment                                             |                   |
| <i>antivirals (remdesivir or lopinavir/ritonavir)</i> | 14 (66.7)         |
| <i>antibiotics</i>                                    | 18 (85.7)         |
| <i>corticostereoids</i>                               | 11 (52.4)         |
| <i>antifungal agent</i>                               | 3 (14.3)          |
| <i>hydroxychloroquine</i>                             | 3 (14.3)          |
| <i>missing information</i>                            | 1 (4.8)           |
| Outcome                                               |                   |
| <i>discharge alive</i>                                | 11 (52.4)         |
| <i>death</i>                                          | 9 (42.8)          |
| <i>missing information</i>                            | 1 (4.8)           |
| Symptomes                                             |                   |
| <i>fever</i>                                          | 19 (90.5)         |
| <i>cough</i>                                          | 14 (66.7)         |
| <i>cough with sputum</i>                              | 4 (19)            |
| <i>sore throat</i>                                    | 1 (4.8)           |
| <i>wheezing</i>                                       | 3 (14.3)          |
| <i>myalgia</i>                                        | 6 (28.6)          |
| <i>arthralgia</i>                                     | 3 (14.3)          |
| <i>fatigue or malaise</i>                             | 10 (47.6)         |
| <i>dyspnea</i>                                        | 16 (76.2)         |
| <i>headache</i>                                       | 2 (9.5)           |
| <i>altered consciousness or confusion</i>             | 1 (4.8)           |
| <i>abdominal pain</i>                                 | 2 (9.5)           |
| <i>nausea</i>                                         | 4 (19)            |
| <i>diarrhea</i>                                       | 4 (19)            |
| <i>skin rash</i>                                      | 1 (4.8)           |
| <i>missing information</i>                            | 1 (4.8)           |
| Comorbidities                                         |                   |
| <i>hypertension</i>                                   | 9 (42.9)          |
| <i>chronic kidney disease</i>                         | 3 (14.3)          |
| <i>diabetes</i>                                       | 4 (19)            |
| <i>chronic cardiac disease</i>                        | 6 (28.6)          |
| <i>chronic pulmonary disease</i>                      | 2 (9.5)           |
| <i>asthma</i>                                         | 2 (9.5)           |
| <i>chronic neurological disorder</i>                  | 1 (4.8)           |
| <i>malignant neoplasm</i>                             | 1 (4.8)           |
| <i>chronic hematologic disease</i>                    | 1 (4.8)           |
| <i>rheumatologic disorder</i>                         | 1 (4.8)           |
| <i>missing information</i>                            | 1 (4.8)           |
